1 **Full Title:** Arbovirus risk perception as a predictor of mosquito-bite preventive behaviors in  
2 Ponce, Puerto Rico

3

4 **Short Title:** Arbovirus risk perception and preventive behaviors in Puerto Rico

5

6 **Authors:** Josée M. Dussault, MSPH<sup>1</sup>, Gabriela Paz-Bailey, MD, PhD<sup>2</sup>, Liliana Sánchez-  
7 González, MD, MPH<sup>2</sup>, Laura E. Adams, DVM, MPH<sup>2</sup>, Dania M. Rodríguez, MS<sup>2</sup>, Kyle R.  
8 Ryff, MPH<sup>2</sup>, Chelsea G. Major, MPH<sup>2</sup>, Olga Lorenzi, MS<sup>2</sup>, Vanessa Rivera-Amill, PhD<sup>3</sup>

9 <sup>1</sup>Department of Epidemiology, University of North Carolina at Chapel Hill, Chapel Hill, NC,  
10 USA; <sup>2</sup>Division of Vector-borne Diseases, Centers for Disease Control and Prevention, San  
11 Juan, Puerto Rico; <sup>3</sup>Ponce Health Sciences University/Ponce Research Institute, Ponce,  
12 Puerto Rico

13

14 **Funding:** All authors who are federal employees have nothing to disclose. VRA received  
15 funding from the National Center for Emerging and Zoonotic Infectious Diseases  
16 (U01CK000437 & U01CK000580). JMD received funding from the National Institute of  
17 Mental Health (3U19MH113202-03S1) and the National Institute of Allergy and Infectious  
18 Diseases (T32 AI 070114). The funders had no role in study design, data collection and  
19 analysis, decision to publish, or preparation of the manuscript.

20 **Competing Interests:** All authors declare no conflicts of interest.

21 **Author Contributions:** Study protocol and materials were developed by Gabriela Paz-  
22 Bailey, Liliana Sánchez-González, Laura E. Adams, Chelsea G. Major, Olga Lorenzi, and  
23 Vanessa Rivera-Amill. Data management was performed by Dania M. Rodríguez and Kyle

24 R. Ryff. Data analysis was performed by Josée Dussault. The first draft of the manuscript  
25 was written by Josée Dussault and all authors commented on previous versions of the  
26 manuscript. All authors read and approved the final manuscript.

27 **Data Availability Statement:** Due to data security and confidentiality guidelines, all  
28 analyses of COPA data must be formally requested to CDC and PHSU. External  
29 researchers can request access to a restricted use dataset after submitting a concept  
30 proposal. Data requests related to COPA can be sent to [dengue@cdc.gov](mailto:dengue@cdc.gov).

31 **Abstract**

32 Mosquito-borne arboviruses are an important cause of morbidity and mortality in the  
33 Caribbean. In Puerto Rico, chikungunya, dengue, and Zika viruses have each caused large  
34 outbreaks during 2010–2022. To date, the majority of control measures to prevent these  
35 diseases focus on mosquito control and many require community participation. In 2018, the  
36 U.S. Centers for Disease Control and Prevention launched the COPA project, a community-  
37 based cohort study in Ponce, Puerto Rico, to measure the impact of novel vector control  
38 interventions in reducing arboviral infections. Randomly selected households from 38  
39 designated cluster areas were offered participation, and baseline data were collected from  
40 2,353 households between May 2018 and May 2019. Household-level responses were  
41 provided by one representative per home. Cross-sectional analyses of baseline data were  
42 conducted to estimate 1) the association between arboviral risk perception and annual  
43 household expenditure on mosquito control, and 2) the association between arboviral risk  
44 perception and engagement in  $\geq 3$  household-level risk reduction behaviors. In this study,  
45 27% of household representatives believed their household was at high risk of arboviruses  
46 and 36% of households engaged in at least three of the six household-level preventive  
47 behaviors. Households where the representative perceived their household at high risk  
48 spent an average of \$35.9 (95% confidence interval: \$23.7, \$48.1) more annually on  
49 mosquito bite prevention compared to households where the representative perceived no  
50 risk. The probability of engaging in  $\geq 3$  household-level mosquito-preventive behaviors was  
51 10.2 percentage points greater (7.2, 13.0) in households where the representatives  
52 perceived high risk compared to those in which the representatives perceived no risk. Paired  
53 with other research, these results support investment in community-based participatory  
54 approaches to mosquito control and providing accessible information for communities to  
55 accurately interpret their risk.

56 **Author Summary**

57 Mosquito-borne disease is an important cause of illness and death in the Caribbean,  
58 including Puerto Rico. Most tactics to prevent these diseases rely on stopping mosquito  
59 bites, either by reducing the mosquito population or creating barriers between mosquitos  
60 and humans. These methods vary in the degree of community involvement required. This  
61 study used data collected from 2,353 households in Ponce, Puerto Rico from May 2018 to  
62 May 2019 to understand how household perception of risk of contracting these diseases  
63 related to 1) the amount of money households spent annually to prevent mosquito bites, and  
64 2) the number of activities their household engaged in to prevent mosquito bites. We found  
65 that 27% of households perceived themselves at high risk of contracting these diseases,  
66 and 36% of households engaged in at least three activities to reduce their risk. On average,  
67 households that perceived themselves at high risk spent more money on mosquito bite  
68 prevention and engaged in more activities to prevent mosquito bites, compared to  
69 households that perceived no risk. Paired with other research in this area, these results  
70 support investment in community-based approaches to mosquito control and ensuring that  
71 communities have accessible information to understand their risk of mosquito-borne  
72 disease.

73

74

## 75 Introduction

76 Mosquito-borne illnesses are an important cause of morbidity and mortality in the  
77 Caribbean [1]. In Puerto Rico, chikungunya, dengue, and Zika viruses have each caused  
78 large outbreaks during 2010–2022. Although chikungunya and Zika viruses were recently  
79 introduced to Puerto Rico, dengue is endemic and seasonal, with outbreaks occurring every  
80 3–5 years [1,2]. All three viruses are transmitted via *Aedes* species mosquito vectors and  
81 can cause acute febrile illness, although each of these diseases has the potential for severe  
82 or long-term outcomes [2–4]. Patients with chikungunya can have persistent joint pain for  
83 months or years. Perinatal Zika infections are known to cause birth defects [5,6]. Evidence  
84 suggests that individuals infected with chikungunya or Zika virus are conferred immunity  
85 against the respective virus [5,7]. However, dengue virus has four serotypes, and individuals  
86 who have been infected with one serotype have a higher risk of severe dengue if later  
87 infected with a different serotype. Severe dengue can be lethal and is characterized by  
88 severe plasma leakage, severe hemorrhage, and/or organ impairment [8]. There are no  
89 specific treatments for any of these diseases and management is primarily supportive.

90 The lack of treatment options for arboviruses is compounded by the scarcity of  
91 pharmaceutical prevention methods. There is currently one vaccine for dengue, CYD-TDV,  
92 approved by the U.S. Food and Drug Administration (FDA) and recommended by the  
93 Advisory Committee on Immunization Practices (ACIP) for use in children 9–16 years old  
94 who live in an endemic area and who have a lab-confirmed history of a previous dengue  
95 infection [9,10]. However, CYD-TDV is only available to a small proportion of the population  
96 at risk for dengue [10], and there are no other FDA-approved vaccines to protect people  
97 from these arboviruses. Thus, the public health community relies on vector control tools to  
98 prevent or reduce arboviral infections in endemic populations. Some of these vector control  
99 tools focus on killing adult mosquitos or reducing population growth through methods like

100 disposal of stagnant water to decrease *Aedes* mosquito breeding sites, fumigation, and  
101 mosquito traps. Other methods focus on creating barriers between humans and mosquitoes  
102 through the use of screens in the doors and windows of buildings, centralized air  
103 conditioning, topical mosquito repellents applied to skin or clothing, and bed nets.

104           There are several barriers to mosquito-borne disease prevention, both at the  
105 individual and household level. In Puerto Rico, where the median household income was  
106 \$20,296 in 2018 [11], the cost of supplies and services to reduce mosquito populations and  
107 mosquito bites can represent a considerable financial burden. Moreover, individuals may  
108 perceive themselves at low risk of contracting arboviral disease, either because they do not  
109 see illnesses in their communities or do not feel that mosquitos are a problem [12]. People  
110 who perceive themselves at low risk may be less motivated to protect themselves and other  
111 members of their household from contracting an arboviral infection. Whether due to financial  
112 capacity or motivation, the underutilization of mosquito prevention techniques and services  
113 puts populations at higher risk of arboviral infection.

114           Most models of health behavior generally emphasize the role of risk perception in  
115 decision making [13,14], but empirical studies on arboviral risk perception have produced  
116 conflicting results [12,15], and there have been few studies investigating arboviral risk  
117 perception and health behaviors in Puerto Rico [16]. Understanding the association between  
118 risk perception and risk reduction behaviors among people living in Puerto Rico can help  
119 guide selection of appropriate public health messaging and interventions to reduce the  
120 incidence of arboviral diseases. If risk perception correlates to increased protective  
121 behaviors, increasing campaigns to raise community awareness about arboviral disease  
122 risks could be beneficial. Alternatively, in the presence of a null relationship between risk  
123 perception and engagement in protective behaviors, then public health agencies may find it

124 more effective to focus efforts on disease prevention methods that do not require active  
125 community engagement.

126           Accordingly, the objective of this study is to better understand the relationship  
127 between risk perception of arboviral diseases and adoption of behaviors to prevent mosquito  
128 bites among people living in southern Puerto Rico communities with high historical arboviral  
129 disease incidence rates. The central hypothesis is that individuals who perceive themselves  
130 at high risk for arboviral infection will be more likely to engage in mosquito-preventive  
131 behaviors than those who perceive no risk. Specifically, this study aims to (1) estimate the  
132 association between perceived household risk of arboviral infection and annual household  
133 expenditure on mosquito control, and (2) estimate the association between perceived  
134 household risk of arboviral infection and reported engagement in mosquito-controlling  
135 behavior (i.e., spraying insecticide, burning citronella candles/coils, etc.) among households  
136 in Ponce, Puerto Rico.

137

## 138 **Methods**

### 139 *Parent Study*

140 COPA (Communities Organized to Prevent Arboviruses) is a prospective community-based  
141 cohort study in Ponce, Puerto Rico initiated in 2018 to evaluate the impact of novel vector  
142 control interventions in reducing arboviral infections. Households were selected randomly  
143 from 38 study-defined cluster areas and visited up to three times to invite them to participate  
144 in COPA; field-level strategies are detailed elsewhere [17]. From May 2018 to May 2019,  
145 2,353 households were enrolled in COPA. Household residents were eligible if they slept an  
146 average of four or more nights per week in the home, were 1-50 years old, and did not  
147 intend to move in the next six months. Study staff administered a standardized

148 questionnaire to participants in Spanish regarding their knowledge, attitudes, and practices  
149 relating to arboviral infections and prevention methods. For each household, we asked one  
150 resident (an adult or emancipated minor) present during data collection to act as the  
151 household representative and answer an additional series of questions specific to their  
152 household. The following is an analysis of cross-sectional interview data from the COPA  
153 household representatives.

154

### 155 *Exposure*

156 The exposure of interest was the household representative's perception of their household's  
157 risk of contracting arboviral illnesses in the next 12 months, which was assessed separately  
158 for Zika, dengue, and chikungunya. However, as the responses to these questions were  
159 highly correlated, dengue was used as a surrogate for all three arboviruses to measure the  
160 household representatives' perceived risk of arboviral infection with three levels: high risk,  
161 low risk, and no risk. Models were tested in which the exposure was coded as a single 3-  
162 level ordinal variable versus as a set of two disjoint indicator (dummy) variables. Disjoint  
163 indicator variables allowed the model to relax the assumption of linearity between the three  
164 levels of the exposure variable by creating two binary variables that represented the low risk  
165 and high risk groups, with no risk as the referent level. The Bayesian information criterion  
166 (BIC) and Akaike information criterion (AIC) were used to compare the fit of the two models.  
167 Generally, models with lower AIC and BIC values are preferred. Where the values produced  
168 different conclusions, the BIC was preferred rather than the AIC because it usually selects  
169 the correct model more frequently than the AIC [18].

170

171



172 *Outcomes*

173 There were two outcomes of interest. The first outcome of interest was annual household  
174 expenditure on mosquito prevention products and services, reported in United States dollars  
175 (USD) by the household representative. The second outcome was regular engagement in  
176 three or more mosquito preventive behaviors. In total, there were six possible household-  
177 level behaviors that the household representative could report during the baseline interview:  
178 (1) Eliminating stagnant water around the house (ex: cleaning containers that collect water  
179 like flowerpots and/or gutters; (2) Covering containers that collect water; (3) Emptying trash  
180 cans, drums, or in-ground trash cans if they had standing water; (4) Cleaning or removing  
181 tires and/or debris from the yard; (5) Spraying insecticide or fumigating indoors or outdoors;  
182 and (6) Burning citronella candles and/or mosquito coils. These behaviors were reported as  
183 the frequency with which any members of the household engaged in these activities in the  
184 previous 12 months, with responses including “daily”, “weekly”, “monthly”, “rarely”, or  
185 “never”. To dichotomize each of the six activities, households that reported daily or weekly  
186 engagement in these behaviors were counted as engaging in these behaviors regularly, and  
187 those who reported performing the activities monthly, rarely, or never were categorized as  
188 not conducting these activities regularly. This outcome was then dichotomized as regular  
189 engagement in three or more of these behaviors. The cutoff of three behaviors was selected  
190 because some activities (e.g., behaviors 1 and 3) appeared to be correlated, likely because  
191 it would be easy to accomplish one task while completing the other.

192

193 *Covariates*

194 Covariates included in this study were from the household representatives’ responses to  
195 questionnaires from the same study visit. These variables included: mosquito bite

196 frequency, household income, exposure to community educational campaigns, education  
197 level, sex, and the community cluster to which the household belonged. Reported mosquito  
198 bites was a binary variable produced from a COPA question asking about where the  
199 participants most often were bitten. If the participant responded saying that they rarely/never  
200 were bitten, this was encoded into the bite frequency variable as “never bitten”. Otherwise,  
201 participants were categorized as “bitten”. Household income was reported as one of eight  
202 categories and remained an ordinal categorical variable in statistical analyses. Education  
203 level was collapsed into five categories due to small counts in some of the original  
204 categories. Sex and educational campaign exposure were binary variables, and age was  
205 maintained as a continuous variable. Education level and community cluster were modeled  
206 as disjoint indicator variables. Rooted in Health Belief Model theory and additional readings  
207 [12–16,18–28], we developed directed acyclic graphs (DAGs) that assisted in the  
208 identification of mediating paths and confounders [29–32]. Based on these DAGs, the  
209 aforementioned covariates included in this study represented a sufficient set of confounders.  
210 Because participating households were selected from community clusters, the intra-cluster  
211 correlation (ICC) coefficient was calculated to assess the need to use multilevel modeling  
212 techniques; the ICC was determined to be small enough (0.02) to include community  
213 clusters as disjoint indicator variables rather than using a 2-level model [33].

214

### 215 *Missing Data*

216 Approximately 11% of participants were missing data on at least one of the covariates, and  
217 most missing data came from the household income variable. A complete case analysis of  
218 these data could result in loss of precision and validity by not including the full possible  
219 sample of households [34–39]. Thus, this analysis used multiple stochastic conditional-

220 mean imputation with coefficient resampling to assign values onto all missing covariates  
221 based on each participant's observed characteristics, assuming that data were missing at  
222 random, conditional on the additional covariates in the imputation model [37,38,40]. The  
223 covariates included as predictive variables in the imputation models were employment  
224 status, whether the house had screens on the windows, and the six risk reduction behaviors  
225 described in the outcomes section. All exposure, outcome, and confounding variables that  
226 would be included in the analysis model were also included in the multiple imputation model.  
227 Multiple imputation methods were applied using Markov chain Monte Carlo (MCMC) method  
228 in SAS software, version 9.4.9 [41], with 50 imputed datasets, 500 burn-in iterations, and  
229 500 additional iterations between imputations; the method used a single chain. The MCMC  
230 method was necessary because the missing data structure was arbitrary, and the number of  
231 burn-in iterations, additional iterations, and imputed datasets were selected based on  
232 recommendations to reduce Monte Carlo error [42–44]. Because two functional forms for the  
233 exposure variable were compared using model fit statistics that are not available in multiple  
234 imputation models, complete case models were used to assess the proper functional form of  
235 the exposure variable, and the multiple imputation model with that exposure coding was  
236 preferred over the complete case model.

237

## 238 *Analytical approach*

### 239 1. *Household expenditure*

240 In this analysis, we were interested in understanding the association between arboviral  
241 disease risk perception and annual household expenditure on risk reduction products and  
242 services as the primary outcome. To estimate the association, we fit a normal linear  
243 regression model. To meet the assumption of homoscedasticity in the model residuals [45],

244 five outlier households whose expenditures ranged from \$1800 to \$3600 were set to missing  
245 values. For comparison, the sixth-largest expenditure value in the data was \$1440, and the  
246 mean expenditure amount was \$185. In the regression model, we included the following  
247 potential confounders: reported mosquito bites, household income, exposure to community  
248 educational campaigns, sex and education level of the household representative, and the  
249 community cluster to which the household belonged.

250

## 251 2. *Household-level risk reduction*

252 The objective of this analysis was to understand the association between household  
253 perception of arboviral disease risk and the prevalence of engaging in household-level risk  
254 reduction behaviors. To estimate the prevalence difference, we fit a linear binomial model  
255 including the same set of potential confounders as described previously. Missing data on all  
256 variables were addressed using multiple imputation as described above. Data were  
257 analyzed using SAS software, version 9.4.9 [41].

258

## 259 *Ethical Consideration*

260 All participants provided written, informed consent. The COPA study was approved by the  
261 Institutional Review Boards (IRB) of Ponce Medical School Foundation, Inc., and CDC. An  
262 exemption for this secondary statistical analysis was approved by the IRB at the University  
263 of North Carolina at Chapel Hill.

264

265 **Results**

266           Among 2,353 household representatives who provided responses, 635 (27%)  
 267 perceived their household at high risk of contracting dengue in the next 12 months.  
 268 Comparatively, 1,249 (53%) believed their households were at low risk, and 425 (18%)  
 269 perceived no risk (Table 1). The mean age of household representatives was 37 years  
 270 (standard deviation [SD]: 8.8 years), 1,596 (68%) were female, and 1,429 (61%) reported  
 271 having completed some postsecondary schooling. Most household representatives reported  
 272 that they were bitten by mosquitoes (n=2,304; 98%); few reported that they were rarely or  
 273 not bitten (n=45; 2%). The most commonly reported household annual income category was  
 274 <\$10,000 (n=915; 39%). Mean annual expenditure on mosquito products was \$185 (SD:  
 275 \$225). A majority (n=1,884; 80%) of household representatives perceived at least some risk  
 276 of contracting dengue in the next year (Tables 1 & 2).

277 **TABLE 1. Distribution of COPA Household Representatives' Perceived Risk by**  
 278 **Arbovirus (N=2,353), 2018-2019**

|                            | Dengue, N (%) | Zika, N (%) | Chikungunya, N (%) |
|----------------------------|---------------|-------------|--------------------|
| <b>Perceived high risk</b> | 635 (28)      | 606 (26)    | 613 (27)           |
| <b>Perceived low risk</b>  | 1249 (54)     | 1264 (55)   | 1221 (53)          |
| <b>Perceived no risk</b>   | 425 (18)      | 435 (19)    | 473 (21)           |
| <b>Missing</b>             | 44            | 48          | 46                 |
| <b>Total</b>               | 2309          | 2305        | 2307               |

279

280 **TABLE 2. Characteristics of COPA household representatives by perceived risk of**  
 281 **dengue (N=2,353), 2018-2019**

|                          | Perceived high risk (n=635) <sup>a</sup> |    | Perceived low risk (n=1,249) <sup>a</sup> |    | Perceived no risk (n=425) <sup>a</sup> |    | Total (N=2,353) <sup>a</sup> |
|--------------------------|------------------------------------------|----|-------------------------------------------|----|----------------------------------------|----|------------------------------|
|                          | N                                        | %  | N                                         | %  | N                                      | %  | N (%)                        |
| <b>Education Level</b>   |                                          |    |                                           |    |                                        |    |                              |
| < High school GED        | 41                                       | 6  | 76                                        | 6  | 67                                     | 16 | 184 (8)                      |
| Finished high school/GED | 171                                      | 27 | 359                                       | 29 | 166                                    | 39 | 704 (30)                     |

|                                                                               |             |           |             |           |             |           |                  |
|-------------------------------------------------------------------------------|-------------|-----------|-------------|-----------|-------------|-----------|------------------|
| Technical/Associate degree                                                    | 188         | 30        | 334         | 27        | 90          | 21        | 620 (27)         |
| Bachelor's degree                                                             | 163         | 26        | 344         | 28        | 77          | 18        | 592 (26)         |
| Professional/Post-graduate                                                    | 69          | 11        | 123         | 10        | 23          | 5         | 217 (9)          |
| <b>Income level</b>                                                           |             |           |             |           |             |           |                  |
| < \$10,000                                                                    | 253         | 42        | 412         | 36        | 239         | 61        | 915 (39)         |
| \$10,000 - \$19,999                                                           | 123         | 21        | 248         | 21        | 58          | 15        | 435 (18)         |
| \$20,000 - \$29,999                                                           | 69          | 12        | 202         | 17        | 41          | 11        | 319 (14)         |
| \$30,000 - \$39,999                                                           | 60          | 10        | 111         | 10        | 23          | 6         | 199 (8)          |
| \$40,000 - \$49,999                                                           | 34          | 6         | 71          | 6         | 8           | 2         | 113 (5)          |
| \$50,000 - \$59,999                                                           | 18          | 3         | 41          | 4         | 7           | 2         | 68 (3)           |
| \$60,000 - \$69,999                                                           | 15          | 3         | 27          | 2         | 7           | 2         | 50 (2)           |
| ≥ \$70,000                                                                    | 25          | 4         | 45          | 4         | 7           | 2         | 78 (3)           |
| <b>Bitten by mosquitos</b>                                                    | 627         | 99        | 1224        | 98        | 410         | 96        | 2304 (98)        |
| <b>Female</b>                                                                 | 439         | 69        | 819         | 66        | 307         | 72        | 1596 (68)        |
| <b>Exposed to educational campaigns, last 12 months</b>                       | 144         | 23        | 300         | 24        | 131         | 31        | 587 (25)         |
| <b>Engaged in protective behavior:</b>                                        | 302         | 48        | 547         | 44        | 153         | 36        | 1018 (44)        |
| <b>#1: Eliminating stagnant water</b>                                         |             |           |             |           |             |           |                  |
| <b>#2: Covering containers that collect water</b>                             | 158         | 25        | 320         | 26        | 95          | 23        | 584 (25)         |
| <b>#3: Emptying trash cans if they have standing water</b>                    | 328         | 52        | 654         | 53        | 175         | 41        | 1181 (51)        |
| <b>#4: Cleaning or removing tires and/or debris from yard</b>                 | 151         | 24        | 305         | 25        | 98          | 24        | 565 (25)         |
| <b>#5: Spraying insecticide or fumigate indoors or outdoors</b>               | 336         | 54        | 500         | 41        | 155         | 37        | 1006 (44)        |
| <b>#6: Burning citronella candles and/or mosquito coils</b>                   | 160         | 25        | 182         | 15        | 51          | 12        | 399 (17)         |
| <b>Household representative wore repellent in the last 30 days</b>            | 443         | 70        | 661         | 53        | 206         | 48        | 1318 (56)        |
| <b>Household engaged in ≥3 protective behaviors<sup>b</sup></b>               | 265         | 42        | 445         | 36        | 114         | 27        | 840 (36)         |
|                                                                               |             |           |             |           |             |           |                  |
|                                                                               | <b>Mean</b> | <b>SD</b> | <b>Mean</b> | <b>SD</b> | <b>Mean</b> | <b>SD</b> | <b>Mean (SD)</b> |
| <b>Age</b>                                                                    | 38          | 8.4       | 36          | 8.9       | 37          | 8.8       | 37 (8.8)         |
| <b>Household Expenditure on Mosquito Products</b>                             | \$211       | \$242     | \$176       | \$206     | \$173       | \$253     | \$185 (\$225)    |
| <b>Number of household mosquito-preventive behaviors reported<sup>b</sup></b> | 2.3         | 1.5       | 2.0         | 1.5       | 1.7         | 1.5       | 2.0 (1.5)        |

282 <sup>a</sup> Percentages presented as proportion of non-missing observations. Total number of missing observations on each variable are  
 283 as follows: a) risk perception (exposure variable), 44; b) education level, 36; c) mosquito bite frequency, 4; d) sex, 0; e) income  
 284 level, 176; f) exposure to educational campaigns, 51; g) protective behavior #1, 26; h) protective behavior #2, 46; i) protective  
 285 behavior #3, 26; j) protective behavior #4, 58; k) protective behavior #5, 44; l) protective behavior #6, 29; m) repellent use in  
 286 the last 30 days, 0; n) age, 0; o) household expenditure on products, 20; p) number of household mosquito-preventive  
 287 behaviors, 17.

288 <sup>b</sup> Household-level mosquito-preventive behaviors: (1) Eliminating stagnant water around the house (ex: cleaning containers that  
 289 collect water like flowerpots and/or gutters; (2) Covering containers that collect water; (3) Emptying trash cans, drums, or in-  
 290 ground trash cans if they had standing water; (4) Cleaning or removing tires and/or debris from yard; (5) Spraying insecticide or  
 291 fumigate indoors or outdoors (ex: Blackjack, Real Kill, Raid); (6) Burning citronella candles and/or mosquito coils.

292 Household representatives who perceived themselves at no risk of arboviral  
 293 diseases generally had lower levels of education compared to the low-risk and high-risk  
 294 perception groups. Contrary to expectation, the no-risk perception group was also more  
 295 likely to report having seen an educational campaign on mosquito prevention and control in  
 296 the last 12 months compared to the other two risk perception groups. In total, 1,318 (56%)  
 297 household representatives reported using mosquito repellent in the last 30 days (Table 2).

298 There was generally low uptake of the six household-level preventive behaviors  
 299 assessed. About half of household representatives (51%) reported emptying trash cans with  
 300 standing water, 44% reported eliminating other sources of stagnant water, and 44%  
 301 reported spraying insecticide around the house or fumigating indoors or outdoors. A small  
 302 number of households reported covering containers that could collect water (25%), cleaning  
 303 debris from around the outside of the house (25%) or burning citronella candles or coils  
 304 (17%) (Table 2). In total, 840 (36%) households engaged in at least three of the six  
 305 household-level preventive behaviors. Households that were engaged in three or more  
 306 preventive behaviors generally had household representatives with higher levels of  
 307 education, a larger household income, and spent more money on mosquito products  
 308 compared to households that engaged in fewer than three preventive behaviors (Table 3).

309

310 **TABLE 3. Characteristics of COPA household representatives by protective behavior**  
 311 **level (N=2,353), 2018-2019<sup>a</sup>**

|                            | Engaged in < 3 protective behaviors (n=1,496) <sup>b</sup> |    | Engaged in ≥ 3 protective behaviors (n=840) <sup>b</sup> |    | Total (N=2,353) <sup>b</sup> |
|----------------------------|------------------------------------------------------------|----|----------------------------------------------------------|----|------------------------------|
|                            | N                                                          | %  | N                                                        | %  | N (%)                        |
| <b>Education Level</b>     |                                                            |    |                                                          |    |                              |
| < High school GED          | 134                                                        | 9  | 49                                                       | 6  | 184 (8)                      |
| Finished high school/GED   | 485                                                        | 33 | 215                                                      | 26 | 704 (30)                     |
| Technical/Associate degree | 370                                                        | 25 | 245                                                      | 30 | 620 (27)                     |
| Bachelor's degree          | 353                                                        | 24 | 235                                                      | 28 | 592 (26)                     |

|                                                          |             |           |             |           |                  |
|----------------------------------------------------------|-------------|-----------|-------------|-----------|------------------|
| Professional/Post-graduate                               | 134         | 9         | 83          | 10        | 217 (9)          |
| <b>Income level</b>                                      |             |           |             |           |                  |
| < \$10,000                                               | 634         | 42        | 281         | 33        | 915 (39)         |
| \$10,000 - \$19,999                                      | 251         | 17        | 184         | 22        | 435 (18)         |
| \$20,000 - \$29,999                                      | 198         | 13        | 121         | 14        | 319 (14)         |
| \$30,000 - \$39,999                                      | 112         | 7         | 87          | 10        | 199 (8)          |
| \$40,000 - \$49,999                                      | 71          | 5         | 42          | 5         | 113 (5)          |
| \$50,000 - \$59,999                                      | 44          | 3         | 24          | 3         | 68 (3)           |
| \$60,000 - \$69,999                                      | 30          | 2         | 20          | 2         | 50 (2)           |
| ≥ \$70,000                                               | 53          | 4         | 25          | 3         | 78 (3)           |
| <b>Regularly bitten by mosquitoes</b>                    | 1463        | 98        | 824         | 98        | 2304 (98)        |
| <b>Female</b>                                            | 1039        | 69        | 547         | 65        | 1596 (68)        |
| <b>Exposure to educational campaigns, last 12 months</b> | 368         | 25        | 219         | 26        | 587 (25)         |
|                                                          |             |           |             |           |                  |
|                                                          | <b>Mean</b> | <b>SD</b> | <b>Mean</b> | <b>SD</b> | <b>Mean (SD)</b> |
| <b>Age</b>                                               | 37          | 8.8       | 37          | 8.8       | 37 (8.8)         |
| <b>Household Expenditure on Mosquito Products</b>        | \$151       | \$195     | \$244       | \$259     | \$185 (\$225)    |

312 <sup>a</sup> There were 6 household-level mosquito-preventive behaviors total: (1) Eliminating stagnant water around the house (ex:  
313 cleaning containers that collect water like flowerpots and/or gutters; (2) Covering containers that collect water; (3) Emptying  
314 trash cans, drums, or in-ground trash cans if they had standing water; (4) Cleaning or removing tires and/or debris from yard;  
315 (5) Spraying insecticide or fumigate indoors or outdoors (ex: Blackjack, Real Kill, Raid); (6) Burning citronella candles and/or  
316 mosquito coils.  
317 <sup>b</sup> Percentages presented as proportion of non-missing observations. Total number of missing observations on each variable are  
318 as follows: a) Number of preventive behaviors engaged in (outcome variable), 17; b) education level, 33; c) mosquito bite  
319 frequency, 4; d) sex, 0; e) income level, 159; f) exposure to educational campaigns, 35; g) age, 0; h) household expenditure on  
320 products, 3.  
321

322 The regression models that encoded risk perception as an ordinal exposure variable  
323 (Models 1, 3, 5, and 7) produced similar outputs to those in which the exposure was coded  
324 as disjoint indicator variables (Models 2, 4, 6, and 8). Nonetheless, the Bayesian information  
325 criterion (BIC) and Akaike information criterion (AIC) values (see S1 Table) preferred the  
326 models in which the exposure is coded as an ordinal variable (Models 1, 3, 5, and 7). These  
327 models also produced estimates with greater precision (Figures 1 & 2, S1 Table). Therefore,  
328 the subsequent description of results will focus on reporting model outputs from models that  
329 used ordinal coding of the exposure variable and multiple imputation (models 3 and 7).



330 Figure 1 shows the output from the regression analysis for the first outcome of  
331 interest, household expenditure on mosquito-preventive products and services. The  
332 adjusted linear regression model with ordinal exposure coding (Model 3) demonstrated that  
333 a 1-unit increase in dengue risk perception (from no risk perception to low, or from low to  
334 high risk perception) was associated with a \$17.9 (95% CI: \$5.8, \$30.1) increase in annual  
335 household expenditure to prevent mosquito bites. On average, households where the  
336 household representative perceived their household at high risk of contracting dengue in the  
337 next year spent \$35.9 (\$23.7, \$48.1) more annually on mosquito bite prevention compared  
338 to a household where the household representative considered their household at no risk.  
339 Figure 1 provides a graphical representation of the model estimates and 95% confidence  
340 intervals. For a detailed comparison of Model 1 – Model 4 outputs, see S1 Table.

341

342 **Figure 1.** Estimates and 95% confidence intervals from four models of the difference in  
343 household expenditure (USD) on mosquito-preventive products per risk perception group,  
344 COPA, 2018-2019<sup>a</sup>

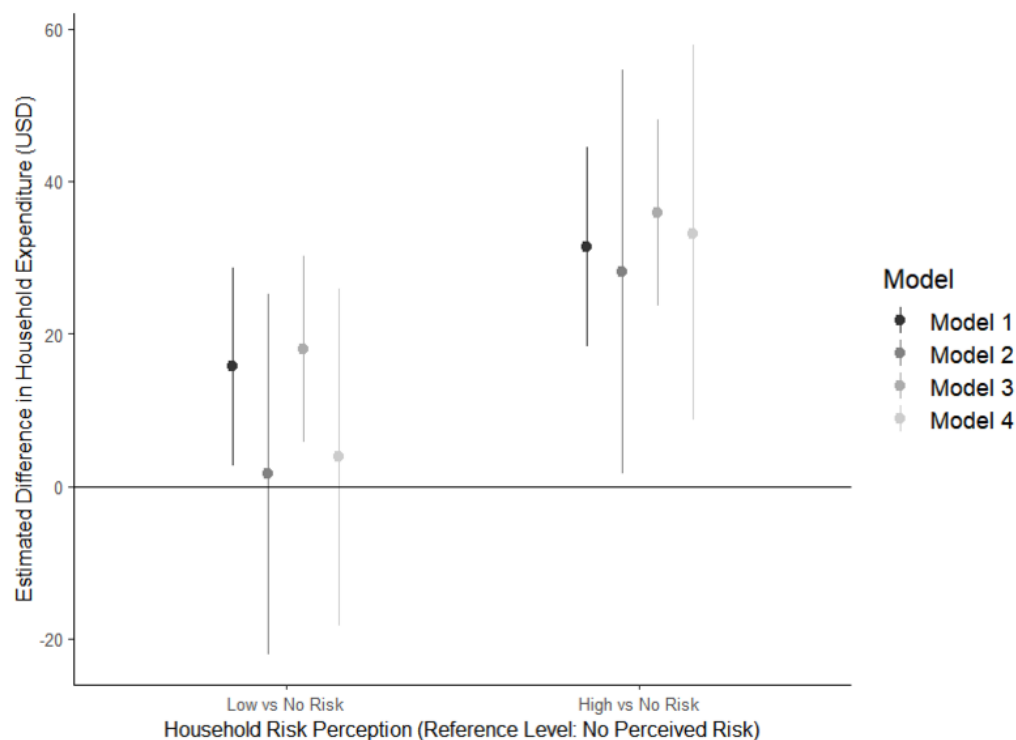

345

346 <sup>a</sup>All models included the full set of covariates as described in the methods section. Point estimates (dots) represent the  
347 average difference in household expenditure (USD) on mosquito preventive products when the household representative  
348 perceived their household at either low risk or high risk (based on the x-axis) compared to when the representative perceived  
349 their household at no risk. The bands around each dot represents the 95% confidence intervals for each point estimate.  
350 Positive values indicate increased spending; negative values indicate decreased spending. Model 1 used an ordinal exposure  
351 variable and complete case analysis; Model 2 used disjoint indicator coding for the exposure variable and complete case  
352 analysis; Model 3 used ordinal exposure variable and multiple imputation to address missing observations; Model 4 used  
353 disjoint indicator coding for the exposure variable and multiple imputation. Model fit statistics can be found in Table 4 in the  
354 supplementary material. Based on superior model fit statistics, Model 3 results are reported in the text.  
355

356

357 **Figure 2.** Prevalence difference estimates and 95% confidence intervals from four models  
358 representing the probability of household engagement in at least three protective behaviors  
359 per risk perception group, COPA, 2018-2019<sup>a</sup>

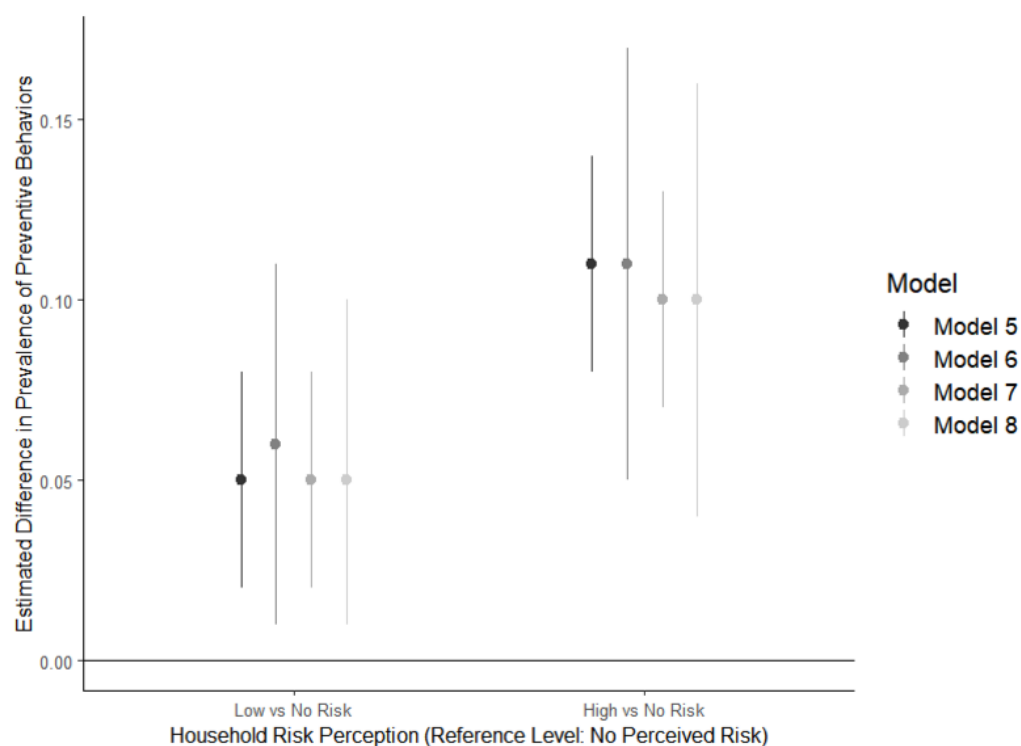

360

361 <sup>a</sup>All models included the full set of covariates as described in the methods section. Point estimates (dots) represent the  
362 average difference in probability that the household engaged in 3 or more protective behaviors when the household  
363 representative perceived their household at either low risk or high risk (based on the x-axis) compared to when the  
364 representative perceived their household at no risk. The bands around each dot represents the 95% confidence intervals for  
365 each point estimate. Positive values indicate increased spending; negative values indicate decreased spending. Model 5 used  
366 an ordinal exposure variable and complete case analysis; Model 6 used disjoint indicator coding for the exposure variable and  
367 complete case analysis; Model 7 used ordinal exposure variable and multiple imputation to address missing observations;  
368 Model 8 used disjoint indicator coding for the exposure variable and multiple imputation. Model fit statistics can be found in  
369 Table 5 in the supplementary material. Based on superior model fit statistics, Model 7 results are reported in the text.  
370

371 The regression model results for the second outcome of interest—the probability of  
372 engaging in at least three household-level protective behaviors—are shown in Figure 2. This  
373 second set of regression models demonstrated that the probability of engaging in at least  
374 three household-level mosquito-preventive behaviors also increased with increasing  
375 arboviral disease risk perception. Model 7, which used ordinal exposure coding and multiple  
376 imputation, estimated that each 1-unit increase of risk perception was associated with an  
377 absolute increase of 5.1 percentage points (95% CI: 0.02, 0.08) in the probability that the  
378 household would report engagement in three or more household-level mosquito-preventive  
379 behaviors. Thus, households with a household representative who reported a high risk  
380 perception had a probability of engaging in three or more household-level mosquito-  
381 preventive behaviors that was 10.2 percentage points greater (95% CI: 7.2, 13.0), compared  
382 to households in which the representatives perceived their household at no risk of arboviral  
383 disease. Figure 2 provides a graphical representation of the model estimates and 95%  
384 confidence intervals. For a detailed comparison of Model 5 – Model 8 outputs, see S1 Table.

385

## 386 **Discussion**

387 This study analyzed a large (N=2,353) sample of households in Ponce, Puerto Rico,  
388 with a median annual household income of \$10,000-\$19,999. This analysis found that after  
389 adjusting for income and other confounders, households with high perceived risk of  
390 contracting arboviruses reported spending \$35.9 more per year (95% CI: \$23.7, \$48.1) on  
391 preventive products and services compared to households with no perceived risk. In a  
392 population where the median annual household income was less than \$20,000, these  
393 results demonstrate that households are willing to invest in mosquito-bite prevention despite  
394 potentially limited resources if there is a high perceived risk of arboviral disease. Study data  
395 also showed a positive association between the household representative's perception of

396 risk and the household's probability of engaging in at least three risk-reducing behaviors.

397 These findings highlight the role of arboviral risk perception in influencing risk-reducing

398 behaviors and support the continued development of community-based programs to

399 increase awareness of arboviral disease risk across Puerto Rico.

400         The association between heightened arbovirus risk perception and increased  
401 prevalence of behaviors to prevent arboviral infections in this study fits well with previous  
402 research related to community engagement in mosquito vector control in Puerto Rico. For  
403 example, in a CDC case study of dengue control measures during an epidemic in the 1990s,  
404 visible public spraying efforts, while largely ineffective, reduced residents' engagement in  
405 mosquito bite preventive activities [21]. As residents shifted the responsibility of mosquito  
406 control to the government, they perceived themselves at low risk of arboviral infection and  
407 were less likely to engage in further protective behaviors. Moreover, a pilot study conducted  
408 in Manuel A. Pérez Public Housing in San Juan, Puerto Rico in 2018 demonstrated the  
409 potency of community-based participatory campaigns to increase employment of mosquito-  
410 control tactics [22]. In that study, community members were directly engaged in the process  
411 of planning and implementing a risk communication initiative for their community. After the  
412 initiative, there was a significant increase in community members' recognition of personal  
413 and community responsibility for the prevention of mosquito-borne disease, and their  
414 engagement in preventive behaviors for mosquito control increased [22].

415         Key strengths of this study include its sample size and the detailed information  
416 captured for each household, which allowed for comprehensive analyses. Another strength  
417 of this analysis is the use of multiple imputation, which allowed us to use all 2,353  
418 households in our analysis and mitigate the risk of selection bias introduced by complete  
419 case analyses [46,47].

420         As in most studies on attitudes and practices that utilize in-person interviews, there  
421 may be some desirability bias in exposure and outcome measurement. Specifically,

422 because the data collection teams visited participants at home after enrolling in a study  
423 focused on arboviruses, participants may have overreported protective behaviors,  
424 particularly if they felt that these were actions expected or supported by study staff.  
425 Likewise, participants who truly perceived themselves at no risk may have reported a low  
426 perceived risk of dengue to satisfy perceived interviewer expectations.

427         Another limitation of our study is the cross-sectional nature of the data, which does  
428 not allow us to assess the temporal sequence between the exposure and outcomes. While  
429 this study assessed whether households perceiving themselves at high risk would  
430 participate in preventive behaviors, it is possible that some participants perceived  
431 themselves at low or no risk of arbovirus in the upcoming 12 months because of their high  
432 engagement in prevention in the previous 12 months. Nevertheless, if this were the  
433 overarching trend, we would have expected to see a negative correlation between the  
434 exposure and outcome variables named in this analysis [27]. One final limitation in this study  
435 is residual confounding bias in the mosquito bite variable. Due to data unavailability, we  
436 dichotomized this variable, but there is plausible heterogeneity within the “bitten” category,  
437 particularly when compared to the “never bitten” level.

438         Our findings add to the growing body of evidence in support of community education  
439 interventions for populations at risk of contracting arboviral diseases. Paired with other  
440 findings [19,21,22], our results suggest that key stakeholders should invest in community-  
441 based participatory approaches to mosquito control, with particular focus on providing  
442 information in an accessible manner for community members to accurately interpret their  
443 risk and make more informed choices to reduce their risk of arboviral disease.

444 **References**

- 445 1. Lowe R, Gasparrini A, Meerbeeck CJV, Lippi CA, Mahon R, Trotman AR, et al.  
446 Nonlinear and delayed impacts of climate on dengue risk in Barbados: A modelling  
447 study. *PLOS Medicine*. 2018;15: e1002613. doi:10.1371/journal.pmed.1002613
- 448 2. Adams LE, Martin SW, Lindsey NP, Lehman JA, Rivera A, Kolsin J, et al. *Epidemiology*  
449 of Dengue, Chikungunya, and Zika Virus Disease in the U.S. States and Territories,  
450 2017. *Am J Trop Med Hyg*. 2019. doi:10.4269/ajtmh.19-0309
- 451 3. Dengue Virus Infections | 2015 Case Definition. [cited 28 Aug 2019]. Available:  
452 [/nndss/conditions/dengue-virus-infections/case-definition/2015/](https://nndss/conditions/dengue-virus-infections/case-definition/2015/)
- 453 4. Petersen LR, Jamieson DJ, Powers AM, Honein MA. Zika Virus. *N Engl J Med*.  
454 2016;374: 1552–1563. doi:10.1056/NEJMr1602113
- 455 5. Zika Virus. In: CDC [Internet]. 5 Nov 2014 [cited 29 Apr 2019]. Available:  
456 <https://www.cdc.gov/zika/vector/range.html>
- 457 6. Marinho PS, Cunha AJ, Amim Junior J, Prata-Barbosa A. A review of selected  
458 Arboviruses during pregnancy. *Maternal Health, Neonatology and Perinatology*.  
459 2017;3: 17. doi:10.1186/s40748-017-0054-0
- 460 7. Chikungunya. [cited 28 Aug 2019]. Available: [https://www.who.int/news-room/fact-](https://www.who.int/news-room/fact-sheets/detail/chikungunya)  
461 [sheets/detail/chikungunya](https://www.who.int/news-room/fact-sheets/detail/chikungunya)
- 462 8. Soo K-M, Khalid B, Ching S-M, Chee H-Y. Meta-Analysis of Dengue Severity during  
463 Infection by Different Dengue Virus Serotypes in Primary and Secondary Infections.  
464 *PLoS One*. 2016;11. doi:10.1371/journal.pone.0154760
- 465 9. First FDA-approved vaccine for the prevention of dengue disease in endemic regions.  
466 In: FDA [Internet]. 11 Sep 2019 [cited 14 Feb 2020]. Available:  
467 [http://www.fda.gov/news-events/press-announcements/first-fda-approved-vaccine-](http://www.fda.gov/news-events/press-announcements/first-fda-approved-vaccine-prevention-dengue-disease-endemic-regions)  
468 [prevention-dengue-disease-endemic-regions](http://www.fda.gov/news-events/press-announcements/first-fda-approved-vaccine-prevention-dengue-disease-endemic-regions)
- 469 10. Dengue Vaccine. In: CDC [Internet]. 25 Jun 2021 [cited 9 Jul 2021]. Available:  
470 <https://www.cdc.gov/dengue/prevention/dengue-vaccine.html>
- 471 11. Puerto Rico | Data USA. [cited 13 Feb 2020]. Available:  
472 <https://datausa.io/profile/geo/puerto-rico/>
- 473 12. Raude J, Chinfatt K, Huang P, Betansedi CO, Katumba K, Vernazza N, et al. Public  
474 perceptions and behaviours related to the risk of infection with Aedes mosquito-borne  
475 diseases: a cross-sectional study in Southeastern France. *BMJ Open*. 2012;2:  
476 e002094. doi:10.1136/bmjopen-2012-002094
- 477 13. Ferrer R, Klein WM. Risk perceptions and health behavior. *Curr Opin Psychol*. 2015;5:  
478 85–89. doi:10.1016/j.copsyc.2015.03.012

- 479 14. Brewer NT, Chapman GB, Gibbons FX, Gerrard M, McCaul KD, Weinstein ND. Meta-  
480 analysis of the relationship between risk perception and health behavior: The example  
481 of vaccination. *Health Psychology*. 2007;26: 136. doi:10.1037/0278-6133.26.2.136
- 482 15. Banneheke H, Paronavitane S, Jayasuriya V, Banneheka S. Perceived Risk of Dengue  
483 in Ones' Living Environment as a Determinant of Behavior Change through Social  
484 Mobilization and Communication: Evidence from a High Risk Area in Sri Lanka. *J*  
485 *Arthropod Borne Dis*. 2016;10: 392–402.
- 486 16. Pérez-Guerra CL, Zielinski-Gutierrez E, Vargas-Torres D, Clark GG. Community  
487 beliefs and practices about dengue in Puerto Rico. *Rev Panam Salud Publica*.  
488 2009;25: 218–226. doi:10.1590/S1020-49892009000300005
- 489 17. Rodríguez DM, Ryff K, Sánchez-Gonzalez L, Rivera-Amill V, Paz-Bailey G, Adams L.  
490 HTrack: A new tool to facilitate public health field visits and electronic data capture.  
491 Angkurawaranon C, editor. *PLoS ONE*. 2020;15: e0244028.  
492 doi:10.1371/journal.pone.0244028
- 493 18. Neath AA, Cavanaugh JE. The Bayesian information criterion: background, derivation,  
494 and applications: The Bayesian information criterion. *WIREs Comp Stat*. 2012;4: 199–  
495 203. doi:10.1002/wics.199
- 496 19. Winch PJ, Leontsini E, Rigau-Pérez JG, Ruiz-Pérez M, Clark GG, Gubler DJ.  
497 Community-based dengue prevention programs in Puerto Rico: impact on knowledge,  
498 behavior, and residential mosquito infestation. *Am J Trop Med Hyg*. 2002;67: 363–370.  
499 doi:10.4269/ajtmh.2002.67.363
- 500 20. Fritzell C, Raude J, Adde A, Dusfour I, Quenel P, Flamand C. Knowledge, Attitude and  
501 Practices of Vector-Borne Disease Prevention during the Emergence of a New  
502 Arbovirus: Implications for the Control of Chikungunya Virus in French Guiana. *PLOS*  
503 *Neglected Tropical Diseases*. 2016;10: e0005081. doi:10.1371/journal.pntd.0005081
- 504 21. Gubler DJ, Clark GG. Community involvement in the control of *Aedes aegypti*. *Acta*  
505 *Tropica*. 1996;61: 169–179. doi:10.1016/0001-706X(95)00103-L
- 506 22. Juarbe-Rey D, Pérez AO, Santoni RPCP, Ramírez MR, Vera M. Using Risk  
507 Communication Strategies for Zika Virus Prevention and Control Driven by Community-  
508 Based Participatory Research. *Int J Environ Res Public Health*. 2018;15.  
509 doi:10.3390/ijerph15112505
- 510 23. Piltch-Loeb R, Merdjanoff AA, Bhanja A, Abramson DM. Support for vector control  
511 strategies in the United States during the Zika outbreak in 2016: The role of risk  
512 perception, knowledge, and confidence in government. *Preventive Medicine*. 2019;119:  
513 52–57. doi:10.1016/j.ypmed.2018.12.019
- 514 24. Miranda E, Santos-Pinto C, Antunes-de-Lima C, Osorio-de-Castro C. Risk Perception  
515 of Zika Virus Infection Among Vulnerable Women in Rio de Janeiro. *Prehospital and*  
516 *Disaster Medicine*. 2019;34: s36–s37. doi:10.1017/S1049023X19000906
- 517 25. Rosenstock IM. The Health Belief Model and Preventive Health Behavior. *Health*  
518 *Education Monographs*. 1974;2: 354–386. doi:10.1177/109019817400200405

- 519 26. Rosenstock IM, Strecher VJ, Becker MH. Social Learning Theory and the Health Belief  
520 Model. *Health Education Quarterly*. 1988;15: 175–183.  
521 doi:10.1177/109019818801500203
- 522 27. Glanz K. *Health Behavior and Health Education: Theory, Research, and Practice*.  
523 Jossey-Bass; 2002.
- 524 28. Jones CL, Jensen JD, Scherr CL, Brown NR, Christy K, Weaver J. The Health Belief  
525 Model as an Explanatory Framework in Communication Research: Exploring Parallel,  
526 Serial, and Moderated Mediation. *Health Commun*. 2015;30: 566–576.  
527 doi:10.1080/10410236.2013.873363
- 528 29. PEARL J. Causal diagrams for empirical research. *Biometrika*. 1995;82: 669–688.  
529 doi:10.1093/biomet/82.4.669
- 530 30. Hernán MA, Hernández-Díaz S, Werler MM, Mitchell AA. Causal Knowledge as a  
531 Prerequisite for Confounding Evaluation: An Application to Birth Defects Epidemiology.  
532 *American Journal of Epidemiology*. 2002;155: 176–184. doi:10.1093/aje/155.2.176
- 533 31. Greenland S, Pearl J, Robins JM. Causal diagrams for epidemiologic research.  
534 *Epidemiology*. 1999;10: 37–48.
- 535 32. VanderWeele TJ, Robins JM. Directed Acyclic Graphs, Sufficient Causes, and the  
536 Properties of Conditioning on a Common Effect. *American Journal of Epidemiology*.  
537 2007;166: 1096–1104. doi:10.1093/aje/kwm179
- 538 33. Killip S, Mahfoud Z, Pearce K. What Is an Intracluster Correlation Coefficient? Crucial  
539 Concepts for Primary Care Researchers. *Ann Fam Med*. 2004;2: 204–208.  
540 doi:10.1370/afm.141
- 541 34. Stuart EA, Azur M, Frangakis C, Leaf P. Multiple Imputation With Large Data Sets: A  
542 Case Study of the Children’s Mental Health Initiative. *American Journal of*  
543 *Epidemiology*. 2009;169: 1133–1139. doi:10.1093/aje/kwp026
- 544 35. Madley-Dowd P, Hughes R, Tilling K, Heron J. The proportion of missing data should  
545 not be used to guide decisions on multiple imputation. *Journal of Clinical Epidemiology*.  
546 2019;110: 63–73. doi:10.1016/j.jclinepi.2019.02.016
- 547 36. Dong Y, Peng C-YJ. *Principled missing data methods for researchers*. Springerplus.  
548 2013;2: 222. doi:10.1186/2193-1801-2-222
- 549 37. Little RJA, Rubin DB. *Statistical Analysis with Missing Data*. John Wiley & Sons; 2019.
- 550 38. Sterne JAC, White IR, Carlin JB, Spratt M, Royston P, Kenward MG, et al. Multiple  
551 imputation for missing data in epidemiological and clinical research: potential and  
552 pitfalls. *BMJ*. 2009;338: b2393. doi:10.1136/bmj.b2393
- 553 39. Greenland S, Finkle WD. A Critical Look at Methods for Handling Missing Covariates in  
554 Epidemiologic Regression Analyses. *American Journal of Epidemiology*. 1995;142:  
555 1255–1264. doi:10.1093/oxfordjournals.aje.a117592



- 556 40. Zhao Y, Long Q. Variable Selection in the Presence of Missing Data: Imputation-based  
557 Methods. *Wiley Interdiscip Rev Comput Stat.* 2017;9. doi:10.1002/wics.1402
- 558 41. Copyright 2020 SAS Institute Inc. SAS and all other SAS Institute Inc. product or  
559 service names are registered trademarks or trademarks of SAS Institute Inc., Cary,  
560 NC, USA.
- 561 42. Yuan Y. Multiple Imputation Using SAS Software. *J Stat Soft.* 2011;45.  
562 doi:10.18637/jss.v045.i06
- 563 43. Harel O, Mitchell EM, Perkins NJ, Cole SR, Tchetgen Tchetgen EJ, Sun B, et al.  
564 Multiple Imputation for Incomplete Data in Epidemiologic Studies. *American Journal of*  
565 *Epidemiology.* 2018;187: 576–584. doi:10.1093/aje/kwx349
- 566 44. Schafer JL. *Analysis of Incomplete Multivariate Data.* CRC Press; 1997.
- 567 45. Schützenmeister A, Jensen U, Piepho H-P. Checking Normality and Homoscedasticity  
568 in the General Linear Model Using Diagnostic Plots. *Communications in Statistics -*  
569 *Simulation and Computation.* 2012;41: 141–154. doi:10.1080/03610918.2011.582560
- 570 46. Westreich D. Berkson’s bias, selection bias, and missing data. *Epidemiology.* 2012;23:  
571 159–164. doi:10.1097/EDE.0b013e31823b6296
- 572 47. Perkins NJ, Cole SR, Harel O, Tchetgen Tchetgen EJ, Sun B, Mitchell EM, et al.  
573 Principled Approaches to Missing Data in Epidemiologic Studies. *Am J Epidemiol.*  
574 2018;187: 568–575. doi:10.1093/aje/kwx348
- 575
- 576
- 577
- 578

579 **S1 Table. Tables 4 & 5.**

580 **Table 4. Model outputs describing the relationship between perceived risk and**  
 581 **household expenditure (USD) on mosquito-preventive products, COPA, 2018-2019<sup>a</sup>**

|                | N    | Multiple Imputation | Exposure Coding                | Low Risk Perception Estimate, $\beta$ (95% CI) <sup>b</sup> | High Risk Perception Estimate, $\beta$ (95% CI) <sup>c</sup> | BIC <sup>d</sup> | AIC <sup>d</sup> |
|----------------|------|---------------------|--------------------------------|-------------------------------------------------------------|--------------------------------------------------------------|------------------|------------------|
| <b>Model 1</b> | 2088 | No                  | 1 ordinal variable             | \$15.7 (2.6, 28.7)                                          | \$31.3 (18.3, 44.4)                                          | 28210            | 28040.96         |
| <b>Model 2</b> | 2088 | No                  | 2 disjoint indicator variables | \$1.6 (-22.1, 25.2)                                         | \$28.1 (1.6, 54.6)                                           | 28216            | 28041.00         |
| <b>Model 3</b> | 2353 | Yes                 | 1 ordinal variable             | \$17.9 (5.8, 30.1)                                          | \$35.9 (23.7, 48.1)                                          | N/A              | N/A              |
| <b>Model 4</b> | 2353 | Yes                 | 2 disjoint indicator variables | \$3.8 (-18.3, 25.9)                                         | \$33.3 (8.7, 57.9)                                           | N/A              | N/A              |

582 <sup>a</sup>All models included the full set of covariates as described in the methods section.

583 <sup>b</sup>Beta estimates in this column represent the average difference in household expenditure (USD) on mosquito preventive  
 584 products when the household representative perceived their household at low risk compared to when the representative  
 585 perceived their household at no risk. Positive values indicate increased spending; negative values indicate decreased  
 586 spending.

587 <sup>c</sup>Beta estimates in this column represent the average difference in household expenditure (USD) on mosquito preventive  
 588 products when the household representative perceived their household at low risk compared to when the representative  
 589 perceived their household at no risk. Positive values indicate increased spending; negative values indicate decreased  
 590 spending.

591 <sup>d</sup>Multiple Imputation models do not output model fitness statistics. Therefore, the model with the best fit (i.e., lower BIC values)  
 592 was determined prior to imputation, and the parallel imputed model was then preferred.

593 **Table 5. Model outputs describing the relationship between perceived arboviral risk**  
 594 **and the probability of engaging in at least three household-level protective**  
 595 **behaviors<sup>a</sup>. COPA, 2018-2019**

|                | N    | Multiple Imputation | Exposure Coding                | Low Risk Perception Estimate, $\beta$ (95% CI) <sup>b</sup> | High Risk Perception Estimate, $\beta$ (95% CI) <sup>c</sup> | BIC <sup>d</sup> | AIC <sup>d</sup> |
|----------------|------|---------------------|--------------------------------|-------------------------------------------------------------|--------------------------------------------------------------|------------------|------------------|
| <b>Model 5</b> | 2093 | No                  | 1 ordinal variable             | 0.05 (0.02, 0.08)                                           | 0.11 (0.08, 0.14)                                            | 2831.1           | 2661.7           |
| <b>Model 6</b> | 2093 | No                  | 2 disjoint indicator variables | 0.06 (0.01, 0.11)                                           | 0.11 (0.05, 0.17)                                            | 2838.6           | 2663.5           |
| <b>Model 7</b> | 2353 | Yes                 | 1 ordinal variable             | 0.05 (0.02, 0.08)                                           | 0.10 (0.07, 0.13)                                            | N/A              | N/A              |
| <b>Model 8</b> | 2353 | Yes                 | 2 disjoint indicator variables | 0.05 (0.01, 0.10)                                           | 0.10 (0.04, 0.16)                                            | N/A              | N/A              |

596 <sup>a</sup>All models included the full set of covariates as described in the methods section.

597 <sup>b</sup>Beta estimates in this column represent the average difference in probability that the household engaged in 3 or more  
 598 protective behaviors when the household representative perceived their household at low risk compared to when the  
 599 representative perceived their household at no risk. Positive values indicate increased probability of engaging in household-  
 600 level protective behaviors; negative values indicate decreased probability of engaging in household-level protective behaviors.

601 <sup>c</sup>Beta estimates in this column represent the average difference in probability that the household engaged in 3 or more  
 602 protective behaviors when the household representative perceived their household at high risk compared to when the  
 603 representative perceived their household at no risk. Positive values indicate increased probability of engaging in household-  
 604 level protective behaviors; negative values indicate decreased probability of engaging in household-level protective behaviors.

605 <sup>d</sup>Multiple Imputation models do not output model fitness statistics. Therefore, the model with the best fit (i.e., lower BIC values)  
 606 was determined prior to imputation, and the parallel imputed model was then preferred.
